# Supplementary material
Source: PubMed Central journal article supplement (PMC6145671)
Supplement: jamapsychiatry-e180577-s001.pdf [file jamapsychiatry-e180577-s001.pdf]

## Supplementary Online Content

DeVylder JE, Kelleher I, Lalane M, Oh H, Link BG, Koyanagi A. Association of urbanicity with psychosis in low- and middle-income countries. *JAMA Psychiatry*. Published online May 16, 2018. doi:10.1001/jamapsychiatry.2018.0577

**eTable 1.** WHS Countries That Were Excluded from Data Analysis

**eTable 2.** Included Study Sites and Ethical Approving Bodies

**eTable 3.** Comparison Between WHS- and World Bank–Defined Urbanicity (2003 Data) for Each Country Included in the Study Sample

**eTable 4.** Indicators of Urbanicity by WHS-Defined Rural and Urban Setting in Low-Income Countries

**eTable 5.** Indicators of Urbanicity by WHS-Defined Rural and Urban Setting in Middle-Income Countries

**eFigure 1.** Countrywise Association Between Urban Residence (Exposure) and Psychotic Experience (Outcome) Among Individuals Aged 18-29 Years

**eFigure 2.** Countrywise Association Between Urban Residence (Exposure) and Psychotic Experience (Outcome) Among Individuals 30 or Older

This supplementary material has been provided by the authors to give readers additional information about their work.

**eTable 1. WHS Countries That Were Excluded from Data Analysis**

| <b>Rationale for Exclusion</b>                                                                                                                                            | <b>List of Excluded Countries</b>                                                       |
|---------------------------------------------------------------------------------------------------------------------------------------------------------------------------|-----------------------------------------------------------------------------------------|
| Lack of sampling information provided by WHO                                                                                                                              | Austria, Belgium, Denmark, Germany, Greece, Guatemala, Italy, Netherlands, Slovenia, UK |
| Data were not nationally representative                                                                                                                                   | China, Comoros, the Republic of Congo, Ivory Coast, India, Russia                       |
| High-income countries that did not include the psychosis screen                                                                                                           | Finland, France, Ireland, Israel, Luxembourg, Norway, Portugal, Sweden                  |
| Middle-income country that did not include the psychosis screen                                                                                                           | Turkey                                                                                  |
| Remaining high-income countries excluded given concerns that it would constitute an insufficient sample to make generalizations across high-income countries more broadly | Spain, United Arab Emirates                                                             |

**eTable 2. Included Study Sites and Ethical Approving Bodies**

| <b>Country</b>         | <b>Ethical Committee Approving the Study</b>                  |
|------------------------|---------------------------------------------------------------|
| Bangladesh             | Mitra and Associates                                          |
| Bosnia and Herzegovina | The Federal Public Health Institute                           |
| Brazil                 | Fundacao Oswaldo Cruz                                         |
| Burkina Faso           | Institut de Recherche en Sciences de la Santé                 |
| Chad                   | Faculté des Sciences de la Santé, Univ N'Djamena              |
| Croatia                | The Croatian National Institute of Public Health              |
| Czech Republic         | Institute of Health Information and Statistics                |
| Dominican Republic     | Centro de Estudios Sociales y Demográficos (CESDEM)           |
| Ecuador                | Fundación Ecuatoriana para la Salud y el Desarrollo (FESALUD) |
| Estonia                | Saar Poll Ltd.                                                |
| Ethiopia               | Department of Community Health, Jimma University              |
| Georgia                | Georgian State Medical Academy (GSMA)                         |
| Ghana                  | Department of Community Health, Ghana Medical School          |
| Hungary                | Johan Bela National Centre for Epidemiology                   |
| Kazakhstan             | Kazakstan School of Public Health (KSPH)                      |
| Kenya                  | Central Bureau of Statistics                                  |
| Laos                   | National Institute of Public Health, Ministry of Health       |
| Latvia                 | The Health Promotion Center                                   |
| Malawi                 | Centre for Social Research (CSR)                              |
| Malaysia               | Public Health Institute, Ministry of Health                   |
| Mali                   | Cellule de Planification et de Statistique (CPS)              |
| Mauritania             | Office Nationale de la Statistique (ONS)                      |
| Mauritius              | Mauritius Institute of Health                                 |
| Mexico                 | Instituto Nacional de Salud Pública                           |
| Morocco                | Ministère de la Santé                                         |
| Myanmar                | Department of Medical Research, Ministry of Health            |
| Namibia                | Ministry of Health                                            |
| Nepal                  | ORG-MARG Nepal PVT.Ltd                                        |
| Pakistan               | Ministry of Health                                            |
| Paraguay               | Fac.de Ciencias Veterinarias, Univ. Nacional/DGEEC            |
| Philippines            | College of Medicine, University of the Philippines            |
| Senegal                | Direction Etudes, Recherche et Formation (DERF)               |
| Slovakia               | Environment,s.c., Centre of Biostatistics and Envi            |
| South Africa           | Community Agency for Social Enquiry (CASE)                    |
| Sri Lanka              | Ministry of Health                                            |
| Swaziland              | Faculty of Health Sciences, Univ Swaziland                    |
| Tunisia                | Institut National de la Santé Publique                        |
| Ukraine                | Odessa State Medical University                               |
| Uruguay                | Centro de Estudios de Economía y Salud (CEES)                 |
| Vietnam                | Ministry of Health                                            |
| Zambia                 | School of Humanities & Social Sciences, University of Zambia  |
| Zimbabwe               | Community Health, University of Zimbabwe                      |

**eTable 3.** Comparison Between WHS- and World Bank–Defined Urbanicity (2003 Data) for Each Country Included in the Study Sample

| Country                        | % rural,<br>World<br>Bank | % rural,<br>WHS | % difference |
|--------------------------------|---------------------------|-----------------|--------------|
| <b>Low-income countries</b>    |                           |                 |              |
| Bangladesh                     | 74.6                      | 75.7            | 1.5          |
| Burkina Faso                   | 80.0                      | 82.2            | 2.7          |
| Chad                           | 78.3                      | 74.7            | -4.8         |
| Ethiopia                       | 84.7                      | 84.3            | -0.5         |
| Ghana                          | 54.0                      | 54.4            | 0.6          |
| Kenya                          | 79.1                      | 60.1            | <b>-31.5</b> |
| Laos                           | 74.9                      | 79.7            | 6.1          |
| Malawi                         | 85.1                      | 84.5            | -0.7         |
| Mali                           | 69.5                      | 68.6            | -1.2         |
| Mauritania                     | 48.4                      | 37.6            | <b>-28.7</b> |
| Myanmar                        | 71.9                      | 70.9            | -1.4         |
| Nepal                          | 85.4                      | 84.8            | -0.8         |
| Pakistan                       | 65.9                      | 66.1            | 0.2          |
| Senegal                        | 59.2                      | 50.1            | <b>-18.2</b> |
| Vietnam                        | 73.9                      | 74.2            | 0.4          |
| Zambia                         | 64.2                      | 63.5            | -1.1         |
| Zimbabwe                       | 65.5                      | 63.7            | -2.9         |
| <b>Middle-income countries</b> |                           |                 |              |
| Bosnia Herzegovina             | 60.8                      | 55.5            | -9.5         |
| Brazil                         | 17.8                      | 17.0            | -4.7         |
| Croatia                        | 44.0                      | 32.7            | <b>-34.4</b> |
| Czech Republic                 | 26.3                      | 27.0            | 2.7          |
| Dominican Republic             | 34.0                      | 41.5            | <b>18.1</b>  |
| Ecuador                        | 38.7                      | 38.2            | -1.3         |
| Estonia                        | 31.0                      | 30.3            | -2.3         |
| Georgia                        | 47.6                      | 48.5            | 1.8          |
| Hungary                        | 34.5                      | 35.1            | 1.7          |
| Kazakhstan                     | 44.9                      | 44.1            | -1.8         |
| Latvia                         | 32.2                      | 33.5            | 3.9          |
| Malaysia                       | 35.2                      | 35.9            | 1.9          |
| Mauritius                      | 58.0                      | 57.0            | -1.7         |
| Mexico                         | 24.3                      | 24.6            | 1.1          |
| Morocco                        | 45.7                      | 42.5            | -7.5         |
| Namibia                        | 65.3                      | 66.8            | 2.3          |
| Paraguay                       | 43.1                      | 43.3            | 0.4          |
| Philippines                    | 52.9                      | 38.6            | <b>-36.9</b> |
| Slovakia                       | 44.1                      | 42.7            | -3.3         |
| South Africa                   | 41.6                      | 43.7            | 4.9          |
| Sri Lanka                      | 81.6                      | 79.4            | -2.8         |
| Swaziland                      | 77.7                      | 75.8            | -2.5         |
| Tunisia                        | 35.4                      | 36.2            | 2.2          |
| Ukraine                        | 32.6                      | 33.3            | 2.2          |
| Uruguay                        | 7.2                       | 7.2             | 0.4          |

**Note:** Bold typeface indicates countries in which the WHS % rural estimate varied from the World Bank % rural estimate by more than 10%. Sensitivity analyses excluding these six countries yielded no meaningful differences in any of the main results of the study.

**eTable 4.** Indicators of Urbanicity by WHS-Defined Rural and Urban Setting in Low-Income Countries

| Country      | Setting | Job <sup>a</sup> | Education  | Wealth <sup>b</sup> | Household ownership |            | Home toilet <sup>c</sup> | Home            |
|--------------|---------|------------------|------------|---------------------|---------------------|------------|--------------------------|-----------------|
|              |         | Agriculture      | (years)    | Poor                | Mobile phone        | Television | Sewage (+)               | Electricity (+) |
| Bangladesh   | Rural   | 22.5             | 3.6 (3.8)  | 25.0                | 2.2                 | 17.4       | 0.6                      | 28.1            |
|              | Urban   | 2.8              | 6.3 (5.9)  | 5.2                 | 17.7                | 64.6       | 14.2                     | 85.3            |
| Burkina Faso | Rural   | 47.6             | 0.4 (1.5)  | 23.7                | 0.1                 | 0.9        | 0.2                      | 1.7             |
|              | Urban   | 9.6              | 4.9 (8.3)  | 2.7                 | 23.0                | 42.5       | 3.2                      | 48.2            |
| Chad         | Rural   | 47.0             | 1.3 (2.7)  | 24.5                | 1.0                 | 1.3        | 0.8                      | 1.1             |
|              | Urban   | 7.7              | 4.0 (5.1)  | 5.8                 | 9.3                 | 12.5       | 4.2                      | 11.5            |
| Ethiopia     | Rural   | 49.4             | 3.5 (3.2)  | 23.9                | 0.0                 | 0.7        | 0.4                      | 4.7             |
|              | Urban   | 3.6              | 7.8 (4.7)  | 2.2                 | 3.7                 | 39.1       | 3.6                      | 90.5            |
| Ghana        | Rural   | 59.0             | 5.1 (4.9)  | 29.5                | 1.8                 | 12.4       | 3.8                      | 28.5            |
|              | Urban   | 16.9             | 8.1 (4.6)  | 8.5                 | 17.0                | 53.2       | 16.0                     | 81.1            |
| Kenya        | Rural   | 36.6             | 7.9 (4.4)  | 22.2                | 10.7                | 15.0       | 1.0                      | 6.9             |
|              | Urban   | 2.0              | 10.4 (3.0) | 16.7                | 33.9                | 44.5       | 37.7                     | 59.1            |
| Laos         | Rural   | 67.2             | 3.5 (3.6)  | 24.8                | 1.8                 | 24.5       | 0.2                      | 27.7            |
|              | Urban   | 25.8             | 7.4 (5.2)  | 2.1                 | 21.8                | 73.8       | 4.1                      | 86.6            |
| Malawi       | Rural   | 33.3             | 4.7 (4.1)  | 21.6                | 1.0                 | 1.9        | 1.2                      | 3.8             |
|              | Urban   | 4.1              | 8.0 (4.6)  | 11.8                | 12.5                | 17.1       | 1.8                      | 30.7            |
| Mali         | Rural   | 36.7             | 1.4 (2.5)  | 25.8                | 1.2                 | 12.7       | 0.3                      | 5.4             |
|              | Urban   | 10.1             | 4.2 (4.1)  | 7.9                 | 23.1                | 49.6       | 2.2                      | 42.1            |
| Mauritania   | Rural   | 13.6             | 2.1 (4.9)  | 40.8                | 2.6                 | 0.6        | 2.3                      | 1.2             |
|              | Urban   | 3.9              | 5.0 (4.2)  | 5.6                 | 46.9                | 44.9       | 21.0                     | 52.0            |
| Myanmar      | Rural   | 54.8             | 5.5 (4.2)  | 25.5                | 0.1                 | 17.1       | 0.2                      | 39.0            |
|              | Urban   | 11.6             | 8.6 (4.3)  | 6.6                 | 0.9                 | 50.5       | 5.7                      | 76.0            |
| Nepal        | Rural   | 52.7             | 3.3 (4.4)  | 23.2                | 0.5                 | 21.9       | 1.6                      | 34.5            |
|              | Urban   | 14.6             | 7.1 (5.1)  | 2.6                 | 6.1                 | 75.2       | 38.9                     | 92.6            |
| Pakistan     | Rural   | 21.6             | 3.1 (4.2)  | 24.8                | 2.6                 | 25.2       | 7.6                      | 74.5            |
|              | Urban   | 6.6              | 5.1 (6.1)  | 10.8                | 10.4                | 51.1       | 35.0                     | 91.5            |
| Senegal      | Rural   | 23.7             | 2.0 (3.5)  | 32.4                | 14.9                | 19.7       | 6.3                      | 25.7            |
|              | Urban   | 5.1              | 5.2 (5.6)  | 8.3                 | 45.6                | 62.7       | 36.4                     | 80.6            |
| Vietnam      | Rural   | 70.4             | 7.4 (3.7)  | 24.8                | 2.8                 | 78.9       | 1.2                      | 87.9            |
|              | Urban   | 14.1             | 9.9 (4.1)  | 7.1                 | 13.6                | 92.5       | 3.4                      | 98.1            |
| Zambia       | Rural   | 52.4             | 5.3 (3.8)  | 28.0                | 0.3                 | 5.0        | 1.9                      | 5.6             |
|              | Urban   | 9.5              | 8.4 (4.0)  | 5.9                 | 11.7                | 43.9       | 34.2                     | 46.8            |
| Zimbabwe     | Rural   | 13.0             | 7.2 (3.9)  | 26.6                | 2.0                 | 14.2       | 4.2                      | 15.5            |
|              | Urban   | 1.6              | 9.6 (3.3)  | 6.4                 | 21.3                | 58.2       | 80.5                     | 75.7            |

Data are % or mean (standard deviation).

<sup>a</sup> Main occupation in the past 12 months (agricultural or fishery worker).

<sup>b</sup> Country-wise wealth quintiles were created using principal component analysis based on 15-20 assets depending on the country. Poor corresponded to the poorest quintile.

<sup>c</sup> Flushed to piped sewage system.

**eTable 5. Indicators of Urbanicity by WHS-Defined Rural and Urban Setting in Middle-Income Countries**

| Country              | Setting | Job <sup>a</sup> | Education  | Wealth <sup>b</sup> | Household ownership |            | Home toilet <sup>c</sup> | Home            |
|----------------------|---------|------------------|------------|---------------------|---------------------|------------|--------------------------|-----------------|
|                      |         | Agriculture      | (years)    | Poor                | Mobile phone        | Television | Sewage (+)               | Electricity (+) |
| Bosnia & Herzegovina | Rural   | 0.5              | 8.8 (4.5)  | 27.7                | 34.4                | 96.0       | 46.3                     | 98.2            |
| Bosnia & Herzegovina | Urban   | 0.0              | 10.7 (3.6) | 10.4                | 49.2                | 98.9       | 84.6                     | 99.0            |
| Brazil               | Rural   | 33.7             | 4.3 (3.6)  | 40.5                | 76.9                | 98.6       | 13.4                     | NA              |
| Brazil               | Urban   | 1.9              | 7.7 (4.9)  | 15.6                | 95.0                | 97.5       | 73.2                     | NA              |
| Croatia              | Rural   | 4.0              | 9.3 (3.6)  | 28.5                | 69.7                | 95.2       | 26.8                     | NA              |
| Croatia              | Urban   | 0.8              | 11.3 (3.7) | 15.9                | 75.8                | 98.3       | 79.2                     | NA              |
| Czech Republic       | Rural   | 2.7              | 12.1 (2.5) | 18.9                | 73.5                | 99.1       | 67.9                     | NA              |
| Czech Republic       | Urban   | 0.0              | 12.5 (2.8) | 20.5                | 74.5                | 98.4       | 96.4                     | NA              |
| Dominican Republic   | Rural   | 22.4             | 6.3 (4.6)  | 32.5                | 24.3                | 72.3       | 9.4                      | 81.9            |
| Dominican Republic   | Urban   | 3.3              | 8.7 (5.0)  | 11.1                | 40.2                | 88.0       | 38.1                     | 98.9            |
| Ecuador              | Rural   | 34.6             | 6.9 (4.0)  | 33.4                | 18.2                | 60.3       | 50.6                     | 92.6            |
| Ecuador              | Urban   | 5.5              | 9.4 (4.6)  | 12.2                | 29.0                | 85.8       | 69.2                     | 99.2            |
| Estonia              | Rural   | 4.3              | 11.0 (3.6) | 16.0                | 71.9                | 97.7       | 50.7                     | NA              |
| Estonia              | Urban   | 1.0              | 12.3 (3.2) | 22.0                | 73.9                | 96.5       | 89.6                     | NA              |
| Georgia              | Rural   | 19.7             | 11.0 (3.4) | 32.4                | 4.4                 | 12.1       | 9.1                      | 15.7            |
| Georgia              | Urban   | 2.6              | 13.4 (2.9) | 9.4                 | 63.3                | 42.8       | 83.8                     | 33.7            |
| Hungary              | Rural   | 9.7              | 10.8 (3.7) | 26.0                | 68.0                | 98.9       | 84.2                     | NA              |
| Hungary              | Urban   | 1.9              | 12.6 (3.5) | 16.8                | 80.3                | 99.6       | 96.1                     | NA              |
| Kazakhstan           | Rural   | 4.9              | 12.5 (3.0) | 26.8                | 53.8                | 7.7        | 19.0                     | 47.5            |
| Kazakhstan           | Urban   | 0.6              | 13.4 (3.0) | 14.7                | 72.0                | 30.0       | 87.0                     | 57.9            |
| Latvia               | Rural   | 4.3              | 11.7 (3.2) | 15.4                | 54.1                | 56.3       | 56.7                     | 31.4            |
| Latvia               | Urban   | 0.2              | 11.7 (3.2) | 22.3                | 56.0                | 53.5       | 83.0                     | 32.5            |
| Malaysia             | Rural   | 20.7             | 7.2 (4.7)  | 36.4                | 39.2                | 93.7       | 9.9                      | NA              |
| Malaysia             | Urban   | 1.2              | 9.6 (4.0)  | 10.7                | 76.2                | 98.2       | 39.2                     | NA              |
| Mauritius            | Rural   | 3.1              | 8.2 (4.1)  | 21.8                | 45.7                | 96.3       | 22.6                     | NA              |
| Mauritius            | Urban   | 0.7              | 9.0 (4.2)  | 17.6                | 50.4                | 97.0       | 60.8                     | NA              |
| Mexico               | Rural   | 59.0             | 5.0 (3.9)  | 48.4                | 70.9                | 97.8       | 27.1                     | NA              |
| Mexico               | Urban   | 6.5              | 8.6 (5.0)  | 10.8                | 95.4                | 98.9       | 87.2                     | NA              |
| Morocco              | Rural   | 22.1             | 5.9 (3.1)  | 39.7                | 53.5                | 76.1       | 2.8                      | 60.6            |
| Morocco              | Urban   | 1.1              | 8.2 (4.4)  | 5.5                 | 76.3                | 94.8       | 87.9                     | 92.9            |
| Namibia              | Rural   | 9.3              | 6.5 (4.8)  | 26.6                | 12.7                | 12.6       | 12.0                     | 20.0            |
| Namibia              | Urban   | 2.7              | 8.7 (5.6)  | 6.5                 | 45.7                | 55.6       | 62.8                     | 69.3            |
| Paraguay             | Rural   | 38.2             | 5.9 (4.2)  | 35.2                | 20.9                | 63.3       | 0.2                      | 86.2            |
| Paraguay             | Urban   | 2.8              | 9.8 (4.4)  | 8.4                 | 47.7                | 90.4       | 20.6                     | 98.7            |
| Philippines          | Rural   | 28.0             | 7.7 (3.9)  | 33.9                | 21.1                | 49.8       | 2.3                      | 67.0            |
| Philippines          | Urban   | 6.7              | 9.4 (3.4)  | 11.2                | 41.7                | 80.2       | 6.9                      | 91.3            |
| Slovakia             | Rural   | 3.6              | 12.0 (1.2) | 19.6                | 66.1                | 99.6       | 47.9                     | NA              |
| Slovakia             | Urban   | 0.6              | 12.5 (4.1) | 20.6                | 74.9                | 98.5       | 74.8                     | NA              |
| South Africa         | Rural   | 9.1              | 7.5 (5.3)  | 28.7                | 43.8                | 80.2       | 28.3                     | NA              |
| South Africa         | Urban   | 1.5              | 8.9 (5.5)  | 13.4                | 68.7                | 89.1       | 92.3                     | NA              |
| Sri Lanka            | Rural   | 16.7             | 8.7 (4.1)  | 22.7                | 7.5                 | 69.9       | 3.2                      | 79.6            |
| Sri Lanka            | Urban   | 4.1              | 10.5 (3.2) | 9.5                 | 35.7                | 83.1       | 22.2                     | 92.6            |
| Swaziland            | Rural   | 2.0              | 6.4 (4.5)  | 25.3                | 8.7                 | 16.3       | 5.7                      | 7.6             |
| Swaziland            | Urban   | 1.6              | 8.2 (4.5)  | 3.0                 | 28.8                | 33.6       | 27.8                     | 27.3            |
| Tunisia              | Rural   | 17.0             | 5.2 (5.5)  | 43.1                | 13.9                | 77.1       | 8.8                      | 93.2            |
| Tunisia              | Urban   | 3.7              | 8.9 (5.7)  | 6.9                 | 33.2                | 94.1       | 78.3                     | 99.1            |
| Ukraine              | Rural   | 4.2              | 11.1 (2.9) | 24.9                | 10.5                | 91.1       | 16.0                     | 99.6            |
| Ukraine              | Urban   | 0.8              | 12.6 (3.5) | 17.6                | 21.4                | 93.0       | 72.7                     | 99.5            |
| Uruguay              | Rural   | 8.5              | 8.8 (6.4)  | 39.0                | 24.2                | 97.3       | 41.7                     | NA              |
| Uruguay              | Urban   | 1.8              | 10.5 (4.3) | 18.5                | 35.3                | 98.4       | 80.9                     | NA              |

Data are % or mean (standard deviation).

<sup>a</sup> Main occupation in the past 12 months (agricultural or fishery worker).

<sup>b</sup> Country-wise wealth quintiles were created using principal component analysis based on 15-20 assets depending on the country. Poor corresponded to the poorest quintile.

<sup>c</sup> Flushed to piped sewage system.

**eFigure 1.** Countrywise Association Between Urban Residence (Exposure) and Psychotic Experience (Outcome) Among Individuals Aged 18-29 Years

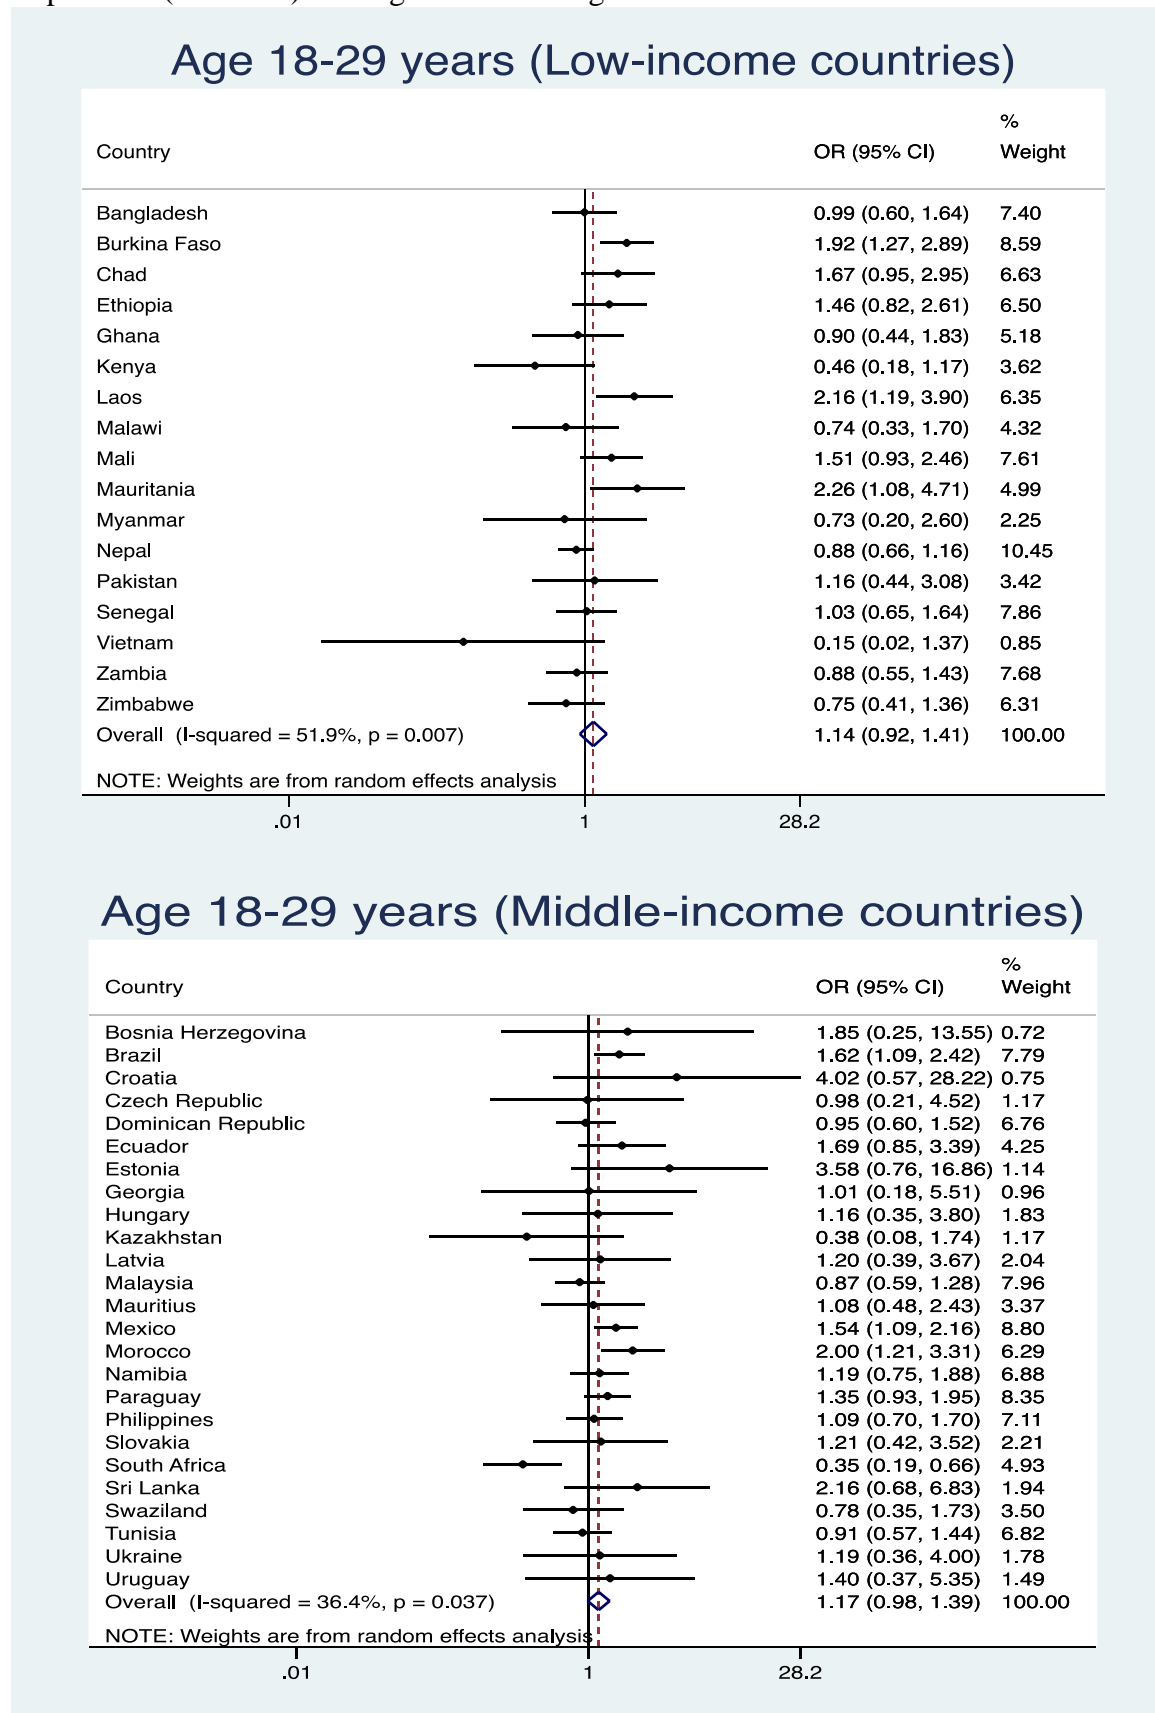

Data are stratified by country income level estimated with multivariable logistic regression adjusting for age and sex. The overall estimate was calculated by random-effects meta-analysis.

Abbreviation: OR Odds ratio; CI Confidence interval

**eFigure 2** Countrywise Association Between Urban Residence (Exposure) and Psychotic Experience (Outcome) Among Individuals 30 Years or Older

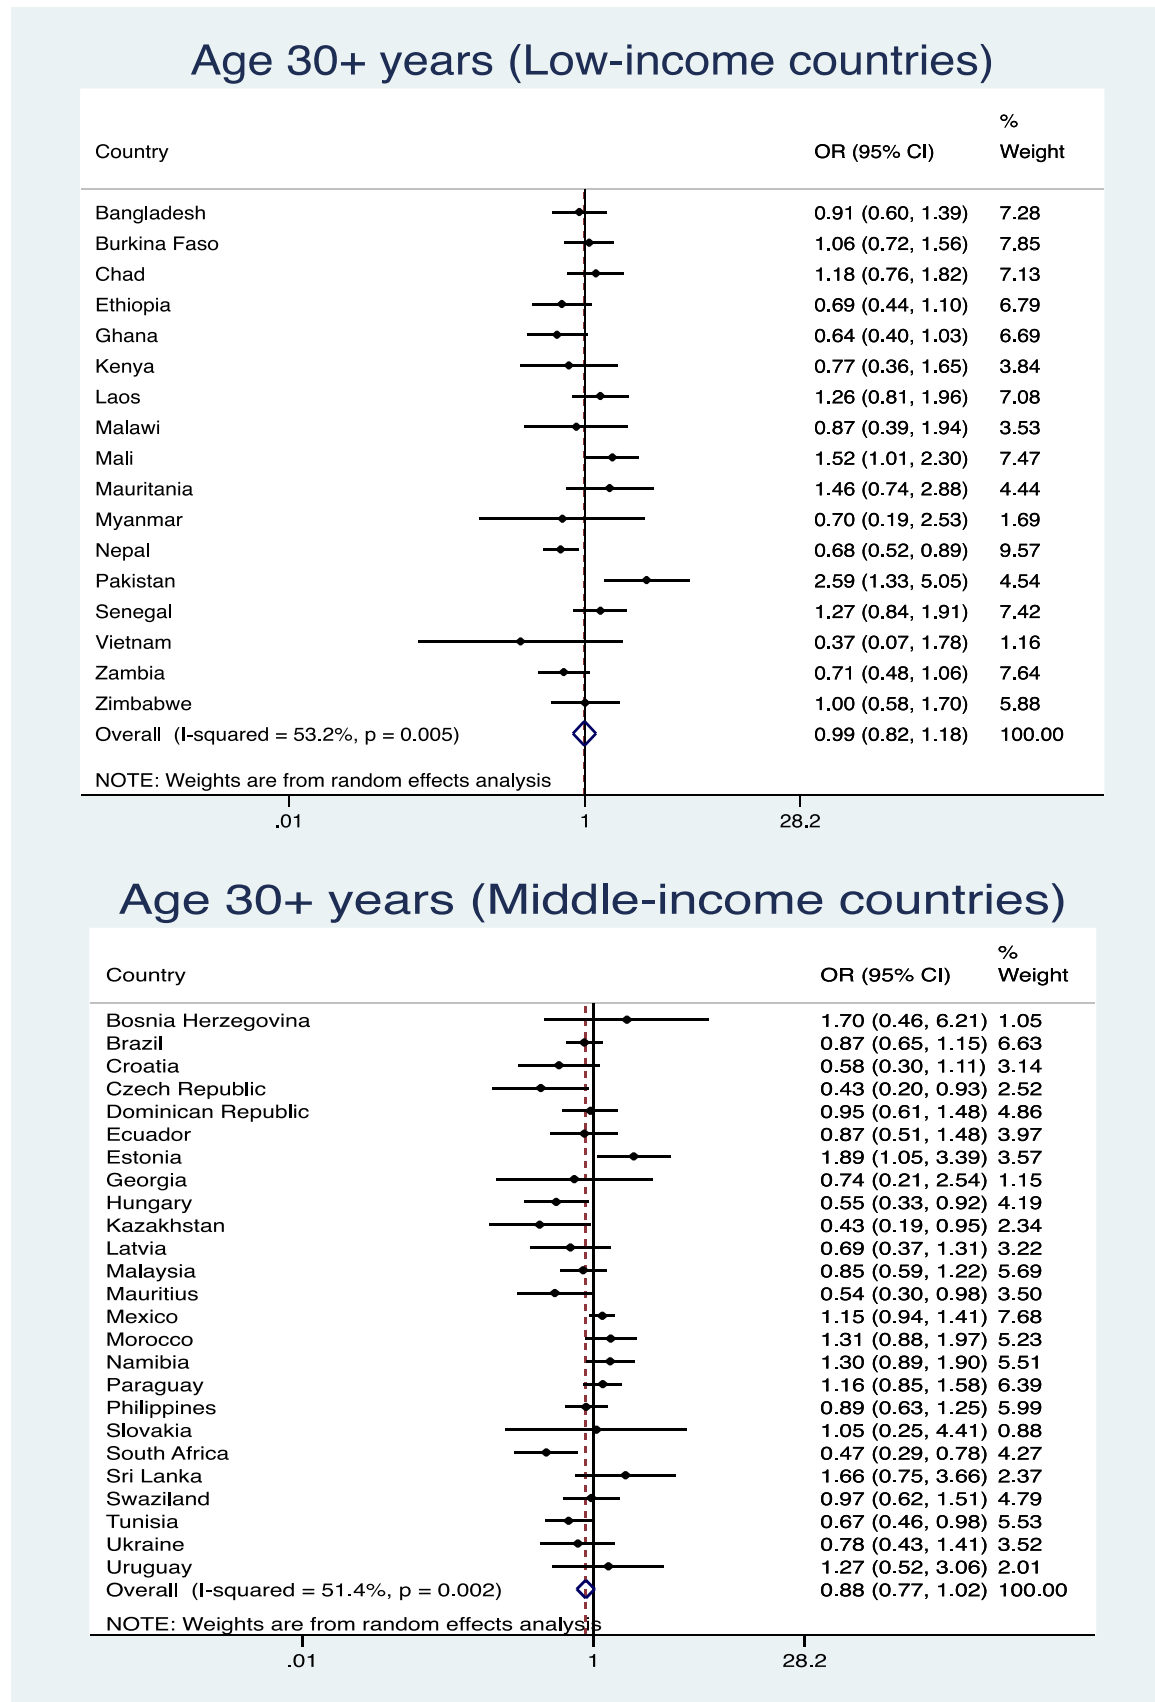

Data were stratified by country income level estimated with multivariable logistic regression adjusting for age and sex. The overall estimate was calculated by random-effects meta-analysis.  
 Abbreviation: OR Odds ratio; CI Confidence interval
